# Supplementary material for: Role of nonresolving inflammation in hepatocellular carcinoma development and progression
Source: PubMed Central journal article supplement (PMC5871907; doi:10.1038/s41698-018-0048-z), 2018-02-23
Supplement: 41698_2018_48_MOESM1_ESM.pdf [file 41698_2018_48_MOESM1_ESM.pdf]

| NCT NO      | Drug                                                            | Other treatment            | Trial Design                                   | Trial Phase | Start        | End          | Last Update posted | No of Enrolled Patients | Incidence of Recurrence and Metastasis After Hepatectomy | OS(months) Overall Survival                            | RFS(months) Recurrence-Free Survival                | PFS (months) Progression-Free Survival                 | ORR(%) Objective Response Rate                    | TTR(months) Time to Recurrence   | TTS(months) Time to Systemic Progression               | TTP (months) Time to Tumor Progression                  | DR (months) duration of response           | DCR(%)                                       | CBR Percentage of Participants With Overall Clinical Benefit | Reference PMID                                | Target Pathways                                                   |
|-------------|-----------------------------------------------------------------|----------------------------|------------------------------------------------|-------------|--------------|--------------|--------------------|-------------------------|----------------------------------------------------------|--------------------------------------------------------|-----------------------------------------------------|--------------------------------------------------------|---------------------------------------------------|----------------------------------|--------------------------------------------------------|---------------------------------------------------------|--------------------------------------------|----------------------------------------------|--------------------------------------------------------------|-----------------------------------------------|-------------------------------------------------------------------|
| NCT01210495 | Axitinib (AG-137376) VS. Placebo                                | Best Supportive care (BSC) | Randomized Parallel assignment Double-Blind    | 2           | Dec 2010     | Dec 2016     | 03-28-2017         | 224                     |                                                          | 12.7(10.2-14.9)<br>8.7(5.9-11.1)<br>p=0.2872           |                                                     | 1.6(2.3-4.6)<br>1.9(1.5-5.5)<br>p=0.0039               | 9.7(5.3-16)<br>2.9(0.4-10.2)<br>p=0.0914          |                                  |                                                        | 7.2(3.5-6)<br>1.9(1.8-3.6)<br>p=0.006                   | 6.4(3.7-9.3)<br>NA                         | 11.3(21.6-39.9)<br>11.8(2.2-1.9)<br>p=0.0025 | 26386123                                                     | VEGFR, PDGFR                                  |                                                                   |
| NCT01140347 | Ramucirumab (DP-131211B) VS. Placebo                            | BSC                        | Randomized Parallel assignment Double-Blind    | 3           | October 2010 | March 2015   | 28-Dec-15          | 565                     |                                                          | 9.17 (8.05 to 10.64)<br>7.62(6.01-9.33)<br>p=0.1591    |                                                     | 2.79 (2.69 to 3.94)<br>2.10 (1.58 to 2.69)<br>p=0.0001 | 1.1 (4.6 to 10.7)<br>9.7 (0.2 to 2.5)<br>p=0.0001 |                                  |                                                        | 3.48 (2.76 to 4.47)<br>2.63 (1.58 to 2.76)<br>p=0.0001  |                                            | 27657524<br>26095784                         | VEGFR2                                                       |                                               |                                                                   |
| NCT01232296 | Doxorubicin VS. Sorafenib                                       |                            | Randomized Parallel assignment Open Label      | 2           | July 2011    | April 2014   | 04-Dec-15          | 165                     |                                                          | 13.125.7 to 39)<br>29.4(22.6 to 56.1)                  |                                                     |                                                        |                                                   |                                  |                                                        | 17.6 (12.3 to 18.4)<br>17.9 (12.3 to 18.9)              |                                            |                                              |                                                              | VEGFR, VEGFR, PDGFR3, F3, c-KIT (Doxorubicin) |                                                                   |
| NCT01203787 | Sorafenib Standard Dosing Regimen VS. Sorafenib Ramp-Up Regimen |                            | Randomized Parallel assignment Open Label      | 4           | Dec 2010     | March 2014   | 05-Mar-15          | 120                     |                                                          |                                                        |                                                     |                                                        |                                                   |                                  |                                                        |                                                         |                                            |                                              |                                                              |                                               | Ref. VEGFR2/PDGFR                                                 |
| NCT00698616 | Immunocell-LC VS. Control                                       |                            | Randomized Parallel assignment Open Label      | 3           | Jul 2008     | Nov 2012     | 9-24-2015          | 250                     |                                                          | N/A<br>N/A<br>p=0.008                                  | 44(2.46-44.54)<br>NA<br>p=0.01                      |                                                        |                                                   |                                  |                                                        |                                                         |                                            |                                              |                                                              | 25742273                                      |                                                                   |
| NCT01379521 | Everolimus VS. Placebo                                          | FAZE                       | Randomized Parallel assignment Quadruple-Blind | 2           | Jun 2011     | June 2015    | 5-3-2017           | 65                      |                                                          | 29.9 (12.0 to N/A)<br>21.7 (19.4 to 27.9)              |                                                     |                                                        |                                                   |                                  |                                                        | 6.3(4.3-6.6)<br>6.4(4.4-9)                              |                                            |                                              |                                                              | mTOR                                          |                                                                   |
| NCT00699374 | Sunitinib Malate VS. Sorafenib                                  |                            | Randomized Parallel assignment Open Label      | 3           | Jul 2008     | Dec 2011     | 1-14-2013          | 1075                    |                                                          | 34.3 (31.9 to 39.9)<br>43.9 (38.1 to 48.7)<br>p=0.0093 |                                                     | 15.3 (12.1 to 17.7)<br>12.6 (12.1 to 17.3)<br>p=0.8857 |                                                   |                                  |                                                        | 17.7 (13.6 to 18.0)<br>15.4 (12.3 to 18.1)<br>p=0.8459  |                                            | 24081937<br>20201173                         | VEGFR2, PDGFR, c-KIT, FRS                                    |                                               |                                                                   |
| NCT00817151 | Bevacizumab + Erlotinib VS. Sorafenib                           |                            | Randomized Parallel assignment Open Label      | 2           | Mar 2009     | Feb 2017     | 11-Sep-17          | 95                      |                                                          | 8.55 (7.00 to 13.9)<br>8.55 (5.69 to 12.2)             |                                                     | 4.37 (2.99 to 7.36)<br>2.76 (1.84 to 4.89)             |                                                   |                                  |                                                        |                                                         |                                            |                                              |                                                              |                                               | VEGFR(Bevacizumab)<br>EGFR(Erlotinib)                             |
| NCT00494322 | Bevacizumab VS. Control                                         | FAZE                       | Randomized Crossover assignment Open Label     | 2           | June 2003    | Feb 2012     | 15-Mar-16          | 30                      |                                                          |                                                        |                                                     |                                                        |                                                   |                                  |                                                        |                                                         |                                            |                                              |                                                              |                                               | VEGF                                                              |
| NCT01770413 | Isatin Granule VS. Blank Control                                |                            | Randomized Parallel assignment Double-Blind    | 4           | Aug 2011     | Aug 2016     | Oct-2-2017         | 1044                    | 37.6%<br>50.9%<br>p=0.0001                               | 75.5(1.15 SE)<br>68.5(1.89 SE)<br>p=0.0001             |                                                     |                                                        |                                                   |                                  |                                                        |                                                         |                                            |                                              |                                                              |                                               | modulation of various pathways in carcinogenesis and angiogenesis |
| NCT01089953 | Sorafenib + Docarubicin VS. Placebo+Docarubicin                 |                            | Randomized Parallel assignment Double-Blind    |             | Apr 2005     | Apr 2008     | 31-Oct-14          | 96                      |                                                          | 13.9(10.57-N/A)<br>6.6(4.95-10.06)<br>p=0.007          |                                                     | 8.07(4.67-10.4)<br>2.8(2.37-5.73)<br>p=0.014           |                                                   |                                  | 8.73(4.87-12.8)<br>4.9(2.8-11)<br>p=0.016              |                                                         |                                            |                                              |                                                              | Ref. VEGFR2/PDGFR                             |                                                                   |
| NCT00692770 | Sorafenib VS. placebo                                           |                            | Randomized Parallel assignment Quadruple-Blind | 3           | Aug 15, 2008 | Nov 28, 2011 | 16-Oct-17          | 1114                    |                                                          | NA<br>NA<br>p=0.484742                                 | 33.8(27.91-44.63)<br>34.2(28.03-39.5)<br>p=0.258329 |                                                        |                                                   | 18.5(13.0-NA)<br>NA<br>p=0.12382 |                                                        |                                                         | 2.96 (2.79 to 4.01)<br>2.60 (1.48 to 2.83) | 56.1<br>45.1                                 | 25058216                                                     | mTOR                                          |                                                                   |
| NCT01015229 | Everolimus VS. Placebo                                          | BSC                        | Randomized Parallel assignment Double-Blind    | 3           | April 2010   | Oct 2013     | 22-Sep-16          | 546                     |                                                          | 7.56 (6.70 to 8.74)<br>7.33 (6.28 to 8.74)             |                                                     |                                                        |                                                   |                                  |                                                        | 2.96 (2.79 to 4.01)<br>2.60 (1.48 to 2.83)              |                                            |                                              |                                                              | mTOR                                          |                                                                   |
| NCT01054443 | Sorafenib VS. Placebo                                           |                            | Randomized Parallel assignment Double-Blind    | 3           | March 2005   | Nov 2008     | 31-Oct-14          | 602                     |                                                          | 10.8(9.53 to 13.5)<br>8.03 (6.37 to 9.2)<br>p=0.00045  |                                                     |                                                        |                                                   |                                  | 4.2(3.3-4.2)<br>4.9(4.3-6.4)<br>p=0.00007              | 5.6(4.2-7)<br>3.7(2.73-4)<br>p=0.00007                  |                                            | 18650514                                     | VEGFR2/PDGFR                                                 |                                               |                                                                   |
| NCT00492372 | Sorafenib VS. Placebo                                           |                            | Randomized Parallel assignment Triple-Blind    | 3           | Oct 2005     | Jul 2009     | 16-Ags-14          | 226                     |                                                          | 8.4 (5.63 to 7.67)<br>4.23 (3.8 to 5.53)<br>p=0.14144  |                                                     |                                                        |                                                   |                                  | 3.5 (2.83 to 4.3)<br>3.43 (2.43 to 4.13)<br>p=0.000537 | 2.8 (2.67 to 3.63)<br>1.38 (1.37 to 1.57)<br>p=0.000537 |                                            | 19085497<br>22240382                         | Ref. VEGFR2/PDGFR                                            |                                               |                                                                   |
| NCT00987935 | BBF 1120 VS. Sorafenib                                          |                            | Randomized Parallel assignment Open Label      | 2           | Oct 2009     | Jan 2016     | 10-Mar-16          | 134                     |                                                          | 10.185 (9.19 to 16.85)<br>10.71 (7.29 to 16.66)        |                                                     | 2.66 (0.99 to 5.55)<br>1.71 (1.77 to 7.36)             |                                                   |                                  |                                                        | 2.76 (0.99 to 5.55)<br>3.71(1.77 to 7.36)               |                                            |                                              |                                                              |                                               |                                                                   |
| NCT00855218 | Sorafenib VS. Placebo                                           | FAZE                       | Randomized Parallel assignment Quadruple-Blind | 2           | March 2009   | Feb 2013     | 18-Aug-17          | 307                     |                                                          | NA(18.47-N/A)<br>NA(18.73-N/A)<br>p=0.295              |                                                     |                                                        |                                                   |                                  |                                                        | 5.63(5.53-7.3)<br>5.53(3.73-5.6)<br>p=0.072             |                                            | 26809111                                     | Ref. VEGFR2/PDGFR                                            |                                               |                                                                   |

**Table 1. Complete randomized clinical trials targeting inflammation in HCC**

Interventional clinical trials in HCC that match the following criteria in [ClinicalTrials.gov](http://ClinicalTrials.gov) were selected: (1) terminated or completed studies, (2) with results, (3) phase 2 or 3 or 4, (4) drugs targeting inflammation-associated pathways, (5) allocation: randomized, and (6) intervention model: parallel or crossover design.
